# Supplementary material for: How to Improve Sensitivity of Sandwich Lateral Flow Immunoassay for Corpuscular Antigens on the Example of Potato Virus Y?
Source: Sensors (Basel). 2018 Nov 15;18(11):3975. doi: 10.3390/s18113975 (PMC6263755; doi:10.3390/s18113975)
Supplement: Supplementary file 1 [file sensors-18-03975-s001.pdf]

## **Electronic Supplementary Material**

### **How to improve sensitivity of sandwich lateral flow immunoassay for corpuscular antigens on the example of potato virus Y?**

**Shyatesa C. Razo<sup>1,2</sup>, Vasily G. Panferov<sup>1</sup>, Irina V. Safenkova<sup>1</sup>, Yuri A. Varitsev<sup>3</sup>, Anatoly  
V. Zherdev<sup>1</sup>, Elena N. Pakina<sup>2</sup>, Boris B. Dzantiev<sup>1\*</sup>**

<sup>1</sup>A.N. Bach Institute of Biochemistry, Research Centre of Biotechnology of the Russian  
Academy of Sciences, Leninsky Prospect 33, 119071 Moscow, Russia

<sup>2</sup>Agricultural-Technological Institute, RUDN University, Miklukho-Maklaya Street 8/2, 117198  
Moscow, Russia

<sup>3</sup>A.G. Lorch All-Russian Potato Research Institute, Kraskovo, Lorch street 23, 140051 Moscow  
region, Russia

\*Correspondence: dzantiev@inbi.ras.ru; Tel.: +7-495-954-3142; Fax: +7-495-954-2804

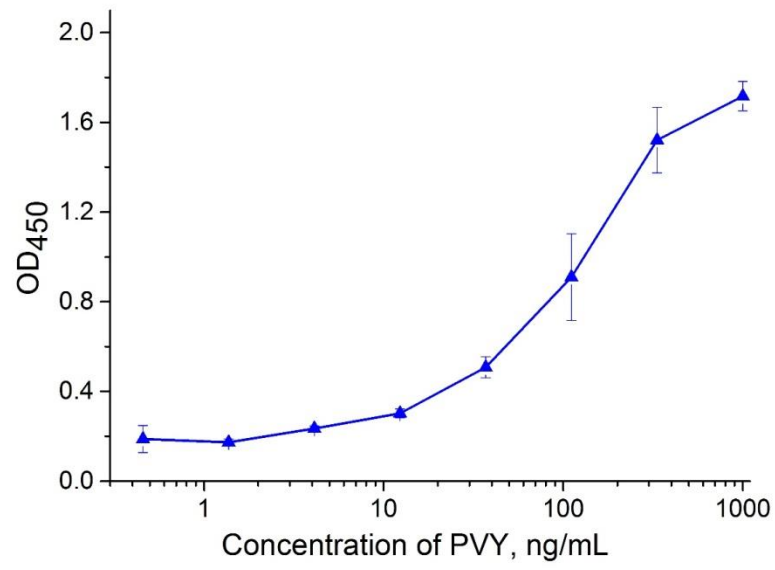

**Figure S1** Calibration curve for ELISA for the detection of PVY<sup>O</sup> in extracts of healthy potatoes.

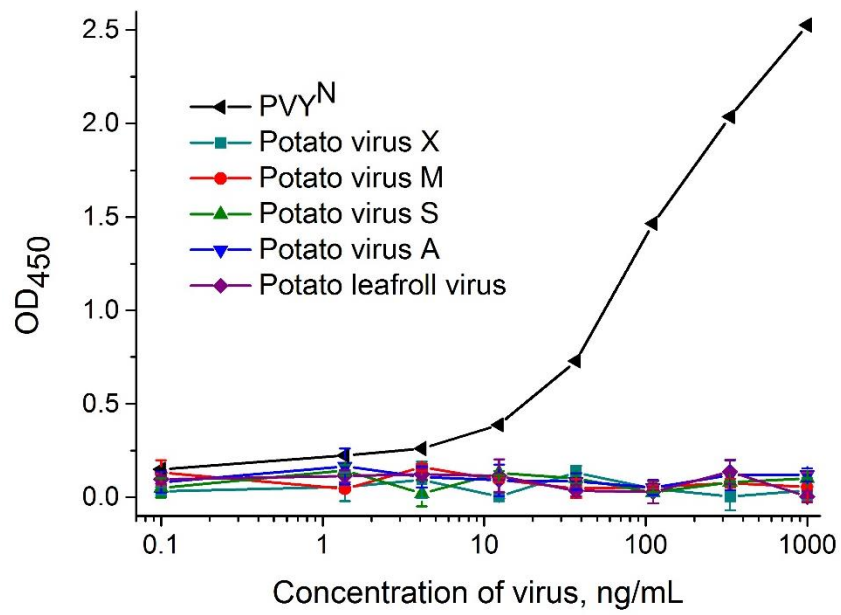

**Figure S2** Calibration curve for ELISA for the detection of PVY<sup>O</sup> and potato virus X, M, S, A, and potato leafroll virus.

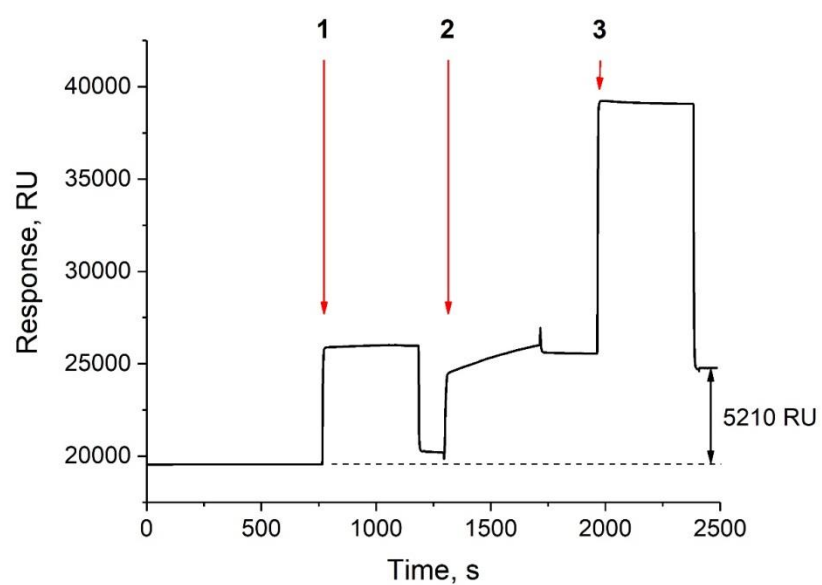

**Figure S3.** Sensogram of the covalent immobilization of the antibodies specific to PVY<sup>O</sup> on a CM5 chip, where 1 indicates the injection of EDC and NHS, 2 indicates the injection of the antibodies, and 3 indicates the injection of ethanolamine.

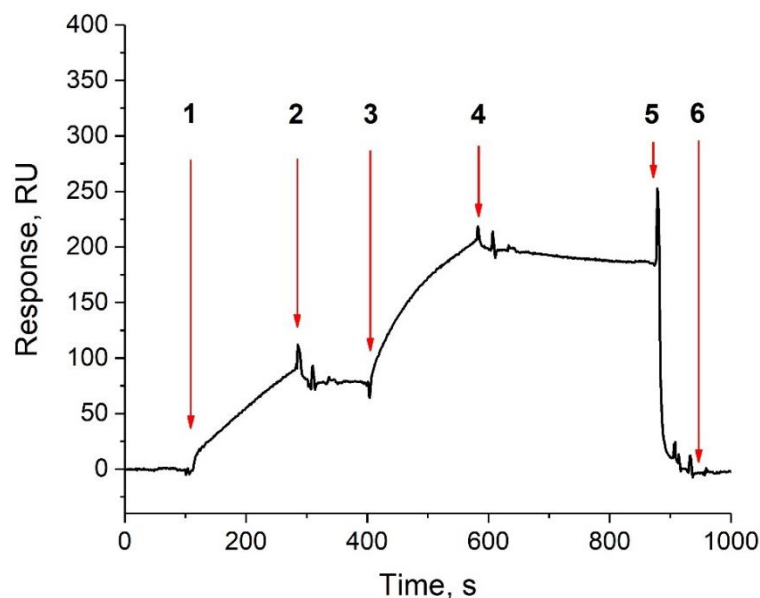

**Figure S4.** Sensogram of a typical cycle for an SPR experiment on a CM5 chip with covalently immobilized antibodies, where 1 indicates the injection of PVY<sup>N</sup> at a constant concentration, 2 indicates the injection of the working buffer, 3 indicates the injection of specific (to PVY<sup>N</sup> or PVY<sup>O</sup>) antibodies (stage for determination of  $k_a$ ), 4 indicates the injection of the working buffer (the stage of dissociation of the complex covalently immobilized antibody–PVY<sup>N</sup>–antibody, determination of  $k_d$ ), 5 indicates the injection of the buffer for destruction of the immune complex and surface regeneration up to covalently immobilized antibodies, and 6 indicates the injection of the working buffer.

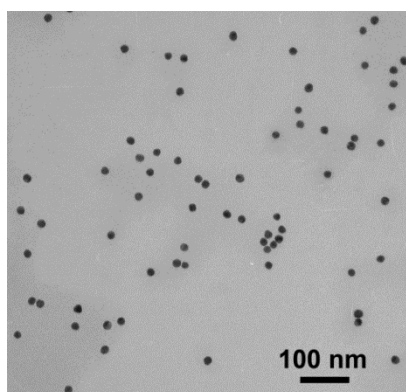

(a)

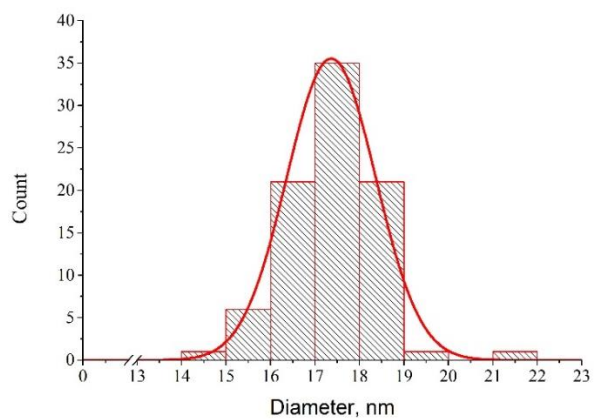

(b)

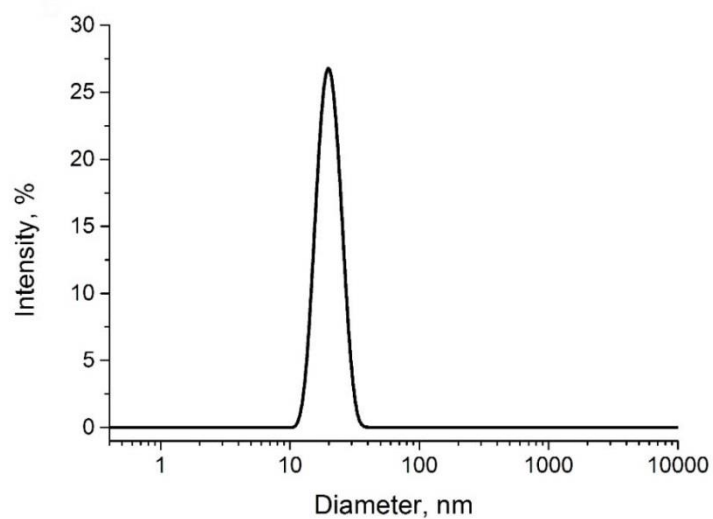

(c)

**Figure S5.** TEM image of GNPs (a) and size distribution histogram (b). DLS graph of the synthesized GNPs (c).

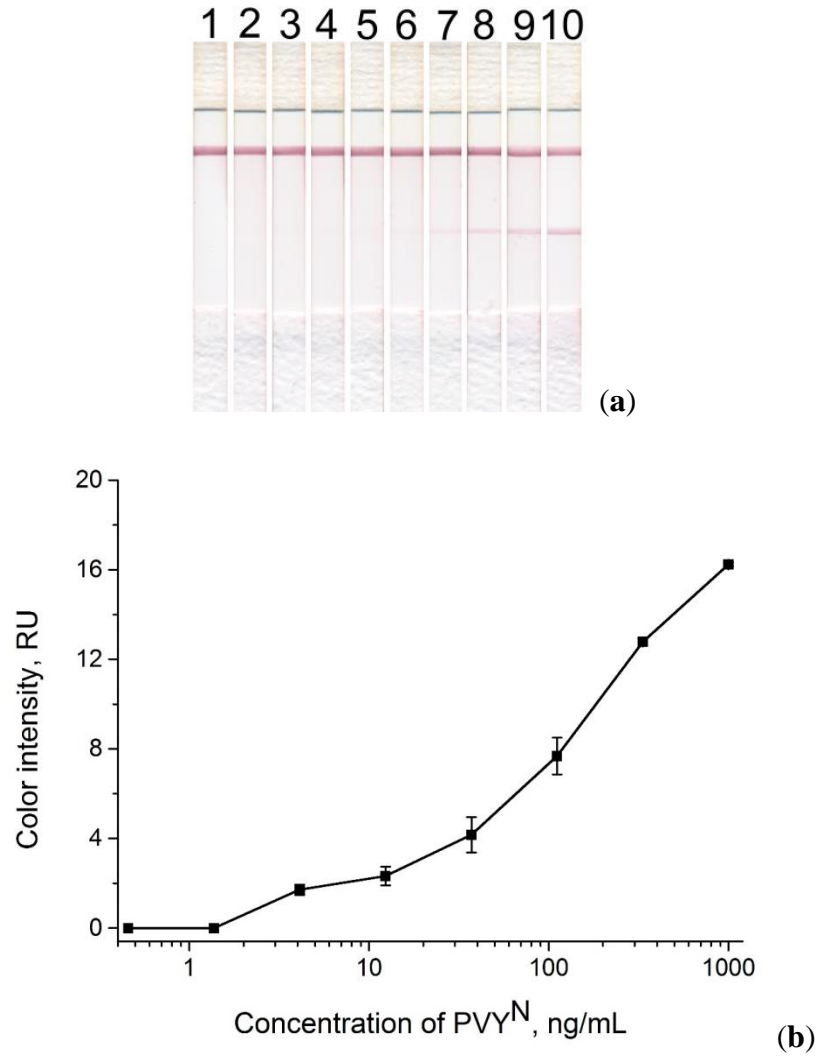

**Figure S6.** LFIA using PVY<sup>N</sup>-spiked plant extract, test strips with sample pad. **(a)** Test strip after analysis, test strip 1 is the negative control (0 ng mL<sup>-1</sup>) and test strips 2-10, PVY<sup>N</sup>-spiked plant extract concentrations: 0.15, 0.46, 1, 4, 12, 37, 111, 333, 1000 ng mL<sup>-1</sup>, respectively. **(b)** Dependence of the color intensity of the test zone on the virus concentration.
